# Supplementary material for: A Healthy Vaginal Microbiota Remains Stable during Oral Probiotic Supplementation: A Randomised Controlled Trial
Source: MDPI journal article supplement (doi:10.3390/microorganisms11020499), 2023-02-16
Supplement: s1 [file s1]

## Supplementary Tables and Figures

**Table S1.** Prevalence of vaginal pH results measured with NutraBlast® Feminine pH Test Strip on each visit.

| Group        | pH* | Visit 2   | Visit 3   | Visit 4   | Visit 5   |
|--------------|-----|-----------|-----------|-----------|-----------|
| <i>Verum</i> | n   | 25        | 25        | 25        | 23        |
|              | 3.0 | 0 (0.0)   | 0 (0.0)   | 0 (0.0)   | 0 (0.0)   |
|              | 3.5 | 1 (4.0)   | 0 (0.0)   | 1 (4.0)   | 0 (0.0)   |
|              | 4.0 | 11 (44.0) | 14 (56.0) | 17 (68.0) | 16 (69.6) |
|              | 4.5 | 12 (48.0) | 11 (44.0) | 7 (28.0)  | 5 (21.7)  |
|              | 5.0 | 1 (4.0)   | 0 (0.0)   | 0 (0.0)   | 2 (8.7)   |
|              | 5.5 | 0 (0.0)   | 0 (0.0)   | 0 (0.0)   | 0 (0.0)   |
| Placebo      | n   | 24        | 24        | 22        | 23        |
|              | 3.0 | 0 (0.0)   | 0 (0.0)   | 0 (0.0)   | 0 (0.0)   |
|              | 3.5 | 1 (4.2)   | 1 (4.2)   | 1 (4.5)   | 0 (0.0)   |
|              | 4.0 | 18 (75.0) | 16 (66.7) | 16 (72.7) | 15 (65.2) |
|              | 4.5 | 4 (16.7)  | 7 (29.2)  | 5 (22.7)  | 8 (34.8)  |
|              | 5.0 | 1 (4.2)   | 0 (0.0)   | 0 (0.0)   | 0 (0.0)   |
|              | 5.5 | 0 (0.0)   | 0 (0.0)   | 0 (0.0)   | 0 (0.0)   |

\*The NutraBlast® Feminine pH Test Strip is interpreted with a scale for pH 3.0, 3.5, 4.0, 4.5, 5.0 and 5.5.

Table S2 (Average, SD, minimum and maximum relative abundance values of amplicon sequence variants (ASVs) detected in at least 2 participants per group and visit in the 16S rDNA sequencing analysis.) is supplied as a separate Excel file.

Confidential

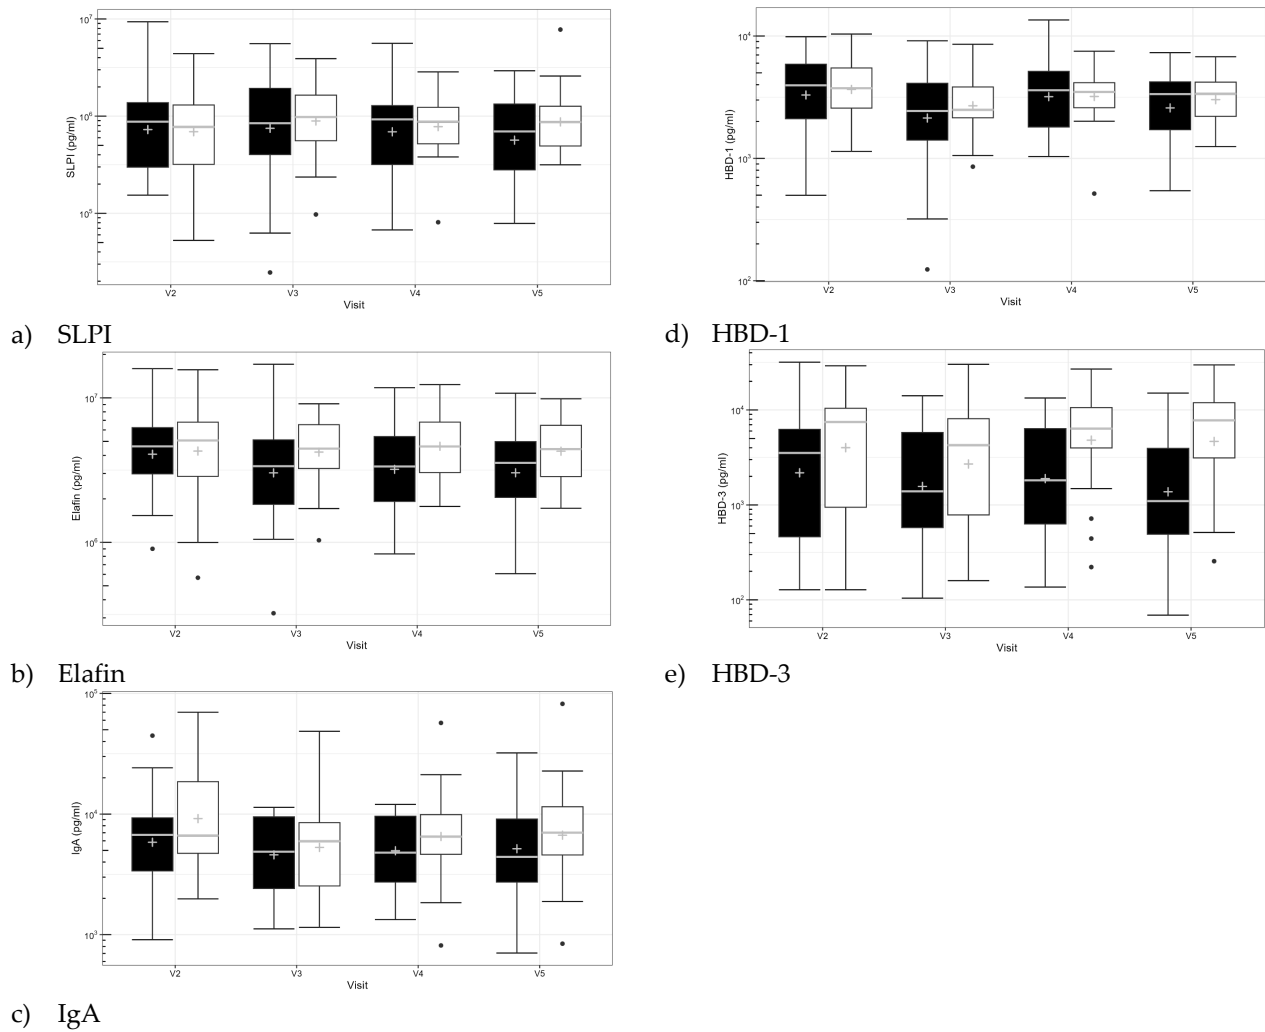

**Figure S1.** Immune marker box plots by group and visit. The verum is presented with black and the placebo with white colour. HBD; Human  $\beta$ -defensin. IgA; Immunoglobulin A. SLPI; Secretory leukocyte protease inhibitor.

Confidential

Confidential

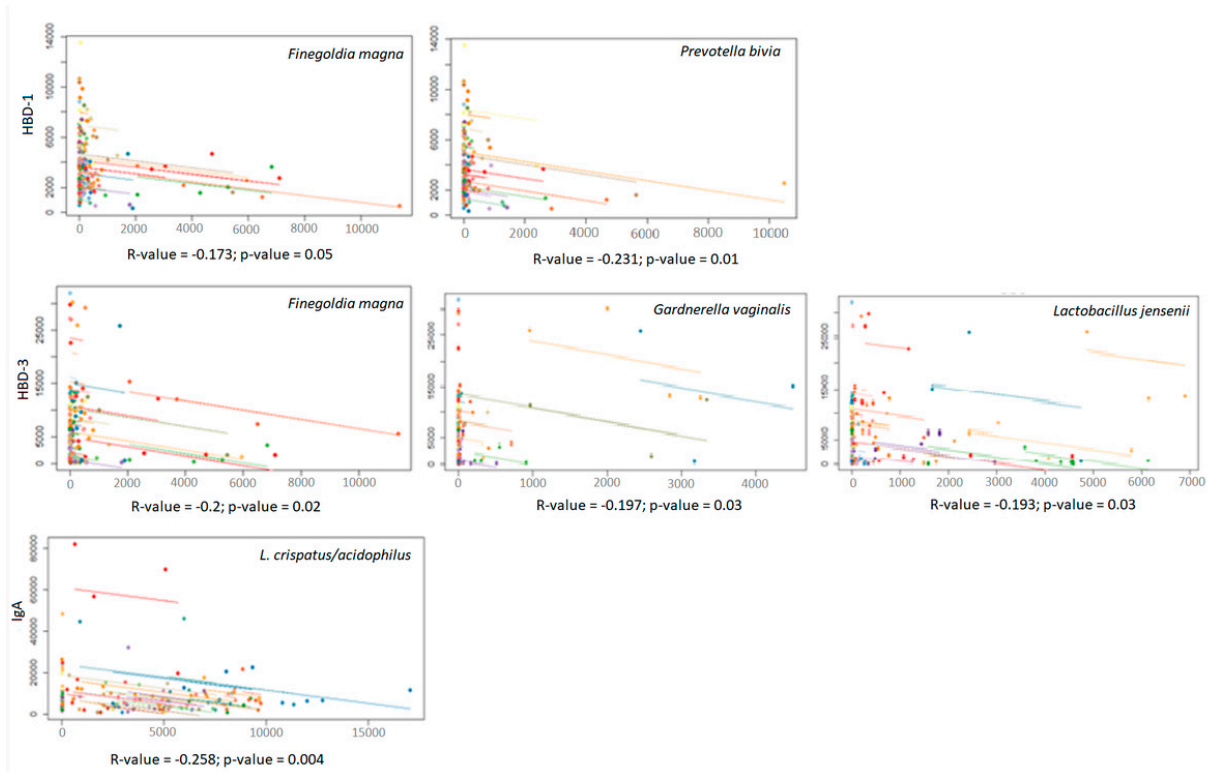

**Figure S2.** Significant correlations detected between immune markers and amplicon sequence variants (ASVs). HBD; Human  $\beta$ -defensin. IgA; Immunoglobulin A. *L. crispatus/acidophilus*; *Lactobacillus crispatus/acidophilus*.

Confidential

Confidential

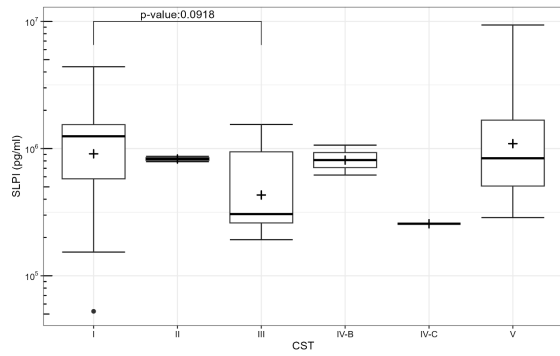

a) SLPI

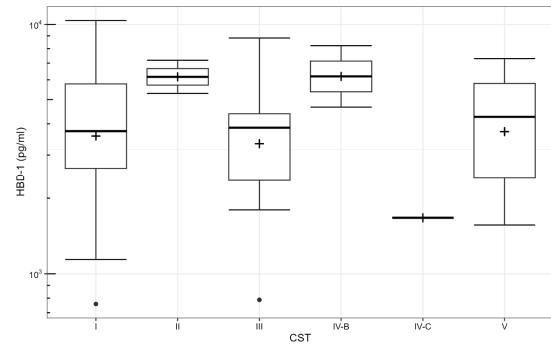

d) HBD-1

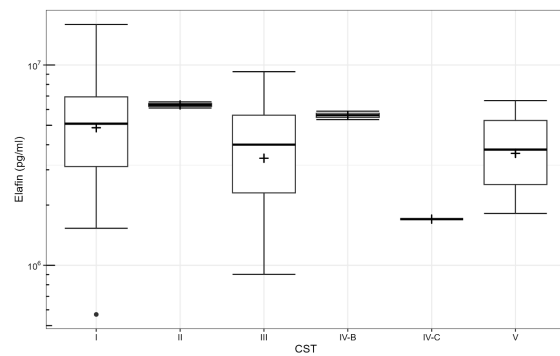

b) Elafin

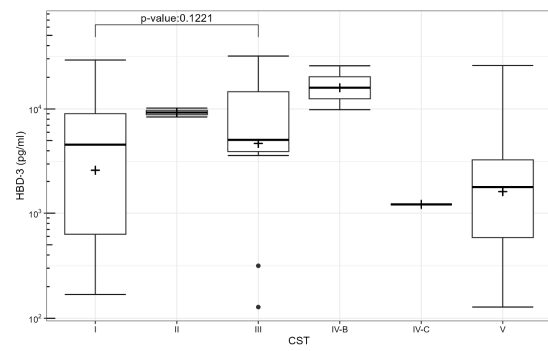

e) HBD-3

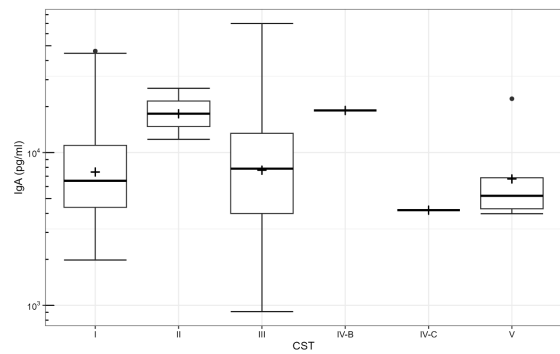

c) IgA

**Figure S3.** Immune marker concentrations at baseline for community state types (CSTs). For Secretory leukocyte protease inhibitor (SLPI) and Human  $\beta$ -defensin 3 (HBD-3) there was a trend of difference between CST I (dominated by *Lactobacillus crispatus*) and CST III (dominated by *Lactobacillus iners*). IgA; Immunoglobulin A.

Confidential
