# Supplementary material for: A Healthy Vaginal Microbiota Remains Stable during Oral Probiotic Supplementation: A Randomised Controlled Trial
Source: Microorganisms. 2023 Feb 16;11(2):499. doi: 10.3390/microorganisms11020499 (PMC9961720; doi:10.3390/microorganisms11020499)
Supplement: Supplementary file 1 [file microorganisms-11-00499-s001.zip › Lyra et al Supplemental Table S2_20230123.xlsx]

## Sheet: Relative abundance of ASVs
Supplementary Table S2. Average, SD, minimum and maximum relative abundance values of amplicon sequence variants (ASVs) detected in at least 2 participants per group and visit in the 16S rDNA sequencing analysis.
		k_Bacteria:
Group_Visit	Statistic	p__Firmicutes..c__Clostridia..o__Clostridiales..f__Peptoniphilaceae..g__Fenollaria..s__massiliensis	p__Firmicutes..c__Bacilli..o__Lactobacillales..f__Lactobacillaceae..g__Lactobacillus	p__Firmicutes..c__Clostridia..o__Clostridiales..f__Peptoniphilaceae..g__Anaerococcus	p__Firmicutes..c__Bacilli..o__Lactobacillales..f__Lactobacillaceae..g__Lactobacillus..s__jensenii	p__Firmicutes..c__Clostridia..o__Clostridiales..f__Peptoniphilaceae..g__Finegoldia..s__magna	p__Actinobacteria..c__Actinobacteria..o__Actinomycetales..f__Actinomycetaceae..g__Varibaculum..s__cambriense	p__Actinobacteria..c__Actinobacteria..o__Bifidobacteriales..f__Bifidobacteriaceae..g__Gardnerella..s__vaginalis	p__Firmicutes..c__Bacilli..o__Lactobacillales..f__Lactobacillaceae..g__Limosilactobacillus..s__reuteri	p__Actinobacteria..c__Actinobacteria..o__Bifidobacteriales..f__Bifidobacteriaceae..g__Bifidobacterium..s__longum	p__Bacteroidetes..c__Bacteroidia..o__Bacteroidales..f__Prevotellaceae..g__Prevotella..s__disiens	p__Firmicutes..c__Bacilli..o__Lactobacillales..f__Lactobacillaceae..g__Lactobacillus..s__crispatus/acidophilus	p__Firmicutes..c__Bacilli..o__Lactobacillales..f__Lactobacillaceae..g__Lactobacillus..s__iners	p__Firmicutes..c__Clostridia..o__Clostridiales..f__Peptoniphilaceae..g__Anaerococcus..s__prevotii	p__Firmicutes..c__Clostridia..o__Clostridiales..f__Clostridiaceae.1..g__Clostridium.sensu.stricto..s__	p__Firmicutes..c__Bacilli..o__Lactobacillales..f__Lactobacillaceae..g__Lactobacillus.3	p__Firmicutes..c__Bacilli..o__Lactobacillales..f__Lactobacillaceae..g__Lactobacillus.4	p__Bacteroidetes..c__Bacteroidia..o__Bacteroidales..f__Prevotellaceae..g__Prevotella..s__timonensis	p__Bacteroidetes..c__Bacteroidia..o__Bacteroidales..f__Prevotellaceae..g__Prevotella..s__bivia	p__Firmicutes..c__Bacilli..o__Lactobacillales..f__Lactobacillaceae..g__Lactobacillus.5	p__Firmicutes..c__Clostridia..o__Clostridiales..f__Peptoniphilaceae..g__Anaerococcus..s__lactolyticus	p__Campilobacterota..c__Campylobacteria..o__Campylobacterales..f__Campylobacteraceae..g__Campylobacter..s__ureolyticus	p__Bacteroidetes..c__Bacteroidia..o__Bacteroidales..f__Prevotellaceae..g__Prevotella..s__timonensis.1	p__Actinobacteria..c__Coriobacteriia..o__Coriobacteriales..f__Atopobiaceae..g__Fannyhessea..s__vaginae	p__Firmicutes..c__Negativicutes..o__Veillonellales..f__Veillonellaceae..g__Veillonella..s__montpellierensis	p__Firmicutes..c__Clostridia..o__Clostridiales..f__Peptoniphilaceae..g__Anaerococcus..s__obesiensis	p__Actinobacteria..c__Actinobacteria..o__Bifidobacteriales..f__Bifidobacteriaceae..g__Gardnerella..s__vaginalis.1	p__Firmicutes..c__Clostridia..o__Clostridiales..f__Peptoniphilaceae..g__Peptoniphilus	p__Firmicutes..c__Negativicutes..o__Veillonellales..f__Veillonellaceae..g__Megasphaera..s__stantonii	p__Tenericutes..c__Mollicutes..o__Mycoplasmatales..f__Mycoplasmataceae..g__Ureaplasma	p__Firmicutes..c__Bacilli..o__Lactobacillales..f__Lactobacillaceae..g__Lactobacillus..s__iners.1	p__Proteobacteria..c__Gammaproteobacteria..o__Enterobacterales..f__Enterobacteriaceae..g__Escherichia.Shigella..s__coli	p__Firmicutes..c__Bacilli..o__Lactobacillales..f__Streptococcaceae..g__Streptococcus..s__agalactiae	p__Bacteroidetes..c__Bacteroidia..o__Bacteroidales..f__Prevotellaceae..g__Prevotella..s__corporis	p__Proteobacteria..c__Betaproteobacteria..o__Burkholderiales..f__Burkholderiaceae..g__Ralstonia..s__syzygii	p__Bacteroidetes..c__Bacteroidia..o__Bacteroidales..f__Prevotellaceae..g__Prevotella..s__bivia.1	p__Firmicutes..c__Bacilli..o__Lactobacillales..f__Lactobacillaceae..g__Lactobacillus..s__iners.2	p__Firmicutes..c__Bacilli..o__Lactobacillales..f__Streptococcaceae..g__Streptococcus..s__anginosus
Placebo_V2	AVE	0.100938	2.39802	0.445238	9.89491	0.319088	0.0726333	1.27243	0.378204	1.95074	0.0499261	54.7486	0.677737	0.0375016	1.14352	0.771512	0.0774073	0.0180614	0.0284447	3.57658	0.198456	0.160621	0.74246	0.204119	0.137099	0.246878	2.91839	0.306654	0	0.115742	0.754575	0.247621	0.0362762	0.0714627	1.27751	0.0762443	14.4072	0.137198
Placebo_V3	AVE	0.0661613	3.98653	0.178643	8.6445	0.895245	0.0286681	1.25993	0.853506	1.30772	0.211023	60.2639	0.732228	0.0110369	1.12526	1.19245	0.136834	0.0460726	0.380438	0.174051	0.0155627	0.069051	0.713043	0.168561	0.122437	0.0789804	1.56271	0.40672	0	0.108354	0.675796	0.036177	0.0969616	0.125426	0.36381	0.922483	12.9496	0.090211
Placebo_V4	AVE	0.0319936	3.12082	0.362746	6.2577	0.686893	0.0871606	1.52584	0.997498	1.77095	0.0852443	63.4235	1.11658	0.00532414	0.999628	0.984017	0.19432	0.0271659	0.296442	0.616595	0.0114253	0.0668225	0.56537	0.150727	0.0892478	0.0794036	0.220723	0.388167	0	0.0675497	0.433486	0.0755403	0.0283524	0.108837	0.227626	0.198459	14.6626	0.0352915
Placebo_V5	AVE	0.102873	3.32749	0.404702	7.5935	0.559367	0.127359	3.81137	0.347582	1.77166	0.128676	55.8175	0.622943	0.0440173	0.97733	0.690907	0.281081	0.0718545	0.0950401	3.73086	0.0239939	0.0676567	0.926813	0.176415	0.379271	0.276678	0.777251	0.390357	0.000758518	0.18062	0.799145	0.0458547	0.235859	0.152853	0.79964	0.122232	14.111	0.0274083
Verum_V2	AVE	0.120622	3.02531	0.321797	9.32512	0.584266	0.327717	2.45198	0.301687	3.75909	1.02575	36.5798	0	0.242598	0.513407	0	0	0.5254	0.0465499	0	0.864922	0.274689	1.01867	1.94157	0.186535	0.735686	1.33766	0.354758	0.4562	0.610973	0.734622	0.03201	0.0644625	0.153455	0.525491	0.392658	31.0784	0.0861412
Verum_V3	AVE	0.0337765	3.78503	0.108402	12.1763	0.583195	0.0441215	2.61167	0.276829	4.4264	0.031789	37.2159	0	0.53099	0.681274	0	0	0.138871	0.037985	0	0.0146389	0.0636837	0.397174	1.7937	1.10405	0.0666303	1.4127	0.327919	0.454462	0.735008	0.613043	0.0755504	1.00002	0.158029	0.780585	0.529406	23.0152	0.427861
Verum_V4	AVE	0.0348315	4.92047	0.0518309	12.2114	0.599589	0.101829	1.80072	0.238655	3.63592	0.109555	40.6612	0	0.199308	0.295005	0	0	0.111253	0.00862026	0	0.0663093	0.0224232	0.336494	2.62478	0.325676	0.467044	1.61094	0.274954	0.565357	0.424905	0.982736	0.0445383	1.02132	0.059904	0.731863	0.200131	25.2237	0.0368132
Verum_V5	AVE	0.336522	0.552725	0.213573	9.66348	0.655645	0.172495	2.26473	0.206878	3.42417	0.337712	42.5361	0	0.208743	0.407478	0	0	0.495798	0.0329425	0	0.169853	0.0727914	1.27191	3.28513	0.879915	0.581773	0.607691	0.656082	0.58285	0.724105	0.555372	0.0404745	1.80256	0.0515724	0.597909	0.708265	25.8134	0.089413
Placebo_V2	SD	0.237597	10.6854	1.55661	18.9232	0.410016	0.254117	3.98912	1.12364	8.91848	0.112547	41.5466	3.10578	0.108682	3.11363	2.67737	0.354725	0.0728482	0.0712771	14.8244	0.879051	0.646232	2.71523	0.825839	0.628268	1.08329	10.3632	0.734827	0	0.327511	2.74947	1.09991	0.108904	0.15155	3.83071	0.156631	26.0212	0.399653
Placebo_V3	SD	0.143758	12.5989	0.455608	18.7227	1.70468	0.0845288	4.78178	3.09127	5.77909	0.629881	40.3003	3.27462	0.0220373	2.37008	4.098	0.611941	0.158119	1.36718	0.778378	0.0440971	0.162611	2.07875	0.682096	0.547554	0.327546	5.95074	0.787277	0	0.179837	2.93912	0.118035	0.368109	0.422019	0.383592	2.26438	22.9163	0.220268
Placebo_V4	SD	0.0746569	10.1356	1.07757	15.4563	2.20722	0.239359	6.02958	3.80918	7.71217	0.162551	39.924	3.50986	0.0206896	2.03014	3.10409	0.84702	0.0837858	1.2541	2.68767	0.0469193	0.177779	2.23372	0.61886	0.387797	0.294483	0.772603	1.06981	0	0.128657	1.58241	0.329273	0.123585	0.30857	0.472996	0.565586	26.5903	0.114092
Placebo_V5	SD	0.272453	10.7477	1.37112	14.095	1.66781	0.565109	12.1382	0.825475	8.27592	0.278164	41.0539	2.92186	0.199169	2.00732	2.33487	1.31839	0.190866	0.357699	16.1851	0.0811249	0.231579	3.6727	0.645621	1.7777	1.17489	3.60572	1.20088	0.00355777	0.35836	3.10875	0.208937	1.09204	0.56596	2.52195	0.240703	25.7425	0.068312
Verum_V2	SD	0.377593	9.98719	1.02225	21.126	1.37372	1.26506	6.23812	0.708133	10.4515	4.1929	37.7545	0	0.917027	1.53804	0	0	1.82816	0.147669	0	3.79173	1.11586	2.38314	5.653	0.611138	2.40866	4.51058	0.905024	2.13977	1.38825	2.95151	0.109743	0.145836	0.5306	0.857951	1.04905	33.442	0.161447
Verum_V3	SD	0.122875	14.0835	0.306868	24.5393	1.16994	0.112769	6.38468	0.43252	12.7199	0.0521928	37.9377	0	2.37078	1.78337	0	0	0.386905	0.134061	0	0.0456329	0.24661	1.12281	5.23092	5.16591	0.202838	3.23862	0.919672	2.13162	2.02751	2.24783	0.258417	4.40473	0.479171	1.24534	1.20755	30.4627	1.04668
Verum_V4	SD	0.0697599	14.5765	0.136304	23.2334	1.54567	0.289732	6.44128	0.393563	7.76836	0.245502	42.5748	0	0.689005	0.676638	0	0	0.311893	0.028959	0	0.209136	0.0394026	0.815625	7.60863	1.08021	1.87951	3.98304	0.606785	2.59079	0.771683	3.05911	0.18036	4.46996	0.189529	1.29592	0.338511	31.029	0.0425223
Verum_V5	SD	0.916434	1.42142	0.707183	19.99	1.09712	0.504977	7.44117	0.280919	9.10602	0.783677	42.475	0	0.554989	1.21773	0	0	1.30694	0.107194	0	0.508787	0.158557	2.98286	10.7686	3.25432	1.44465	1.54055	1.24977	2.67095	1.23903	1.73205	0.0841889	7.09441	0.191424	0.97688	1.78937	32.5065	0.16709
Placebo_V2	MIN	0	0	0	0	0	0	0	0	0	0	0	0	0	0	0	0	0	0	0	0	0	0	0	0	0	0	0	0	0	0	0	0	0	0	0	0	0
Placebo_V3	MIN	0	0	0	0	0	0	0	0	0	0	0.117207	0	0	0	0	0	0	0	0	0	0	0	0	0	0	0	0	0	0	0	0	0	0	0	0	0.0269489	0
Placebo_V4	MIN	0	0	0	0	0	0	0	0	0	0	0.178901	0	0	0	0	0	0	0	0	0	0	0	0	0	0	0	0	0	0	0	0	0	0	0	0	0	0
Placebo_V5	MIN	0	0	0	0	0	0	0	0	0	0	0	0	0	0	0	0	0	0	0	0	0	0	0	0	0	0	0	0	0	0	0	0	0	0	0	0	0
Verum_V2	MIN	0	0	0	0	0	0	0	0	0	0	0.119074	0	0	0	0	0	0	0	0	0	0	0	0	0	0	0	0	0	0	0	0	0	0	0	0	0	0
Verum_V3	MIN	0	0	0	0	0	0	0	0	0	0	0	0	0	0	0	0	0	0	0	0	0	0	0	0	0	0	0	0	0	0	0	0	0	0	0	0	0
Verum_V4	MIN	0	0	0	0	0	0	0	0	0	0	0.123717	0	0	0	0	0	0	0	0	0	0	0	0	0	0	0	0	0	0	0	0	0	0	0	0	0	0
Verum_V5	MIN	0	0	0	0	0	0	0	0	0	0	0.135737	0	0	0	0	0	0	0	0	0	0	0	0	0	0	0	0	0	0	0	0	0	0	0	0	0	0
Placebo_V2	MAX	0.876642	51.3572	7.49533	80.6604	1.44337	1.22508	15.8535	5.4537	42.8203	0.427266	99.7675	14.9102	0.504666	14.3863	12.144	1.70296	0.348648	0.215545	71.1271	4.22517	3.11693	12.9568	3.96218	3.01618	5.21028	48.6364	3.52273	0	1.55816	12.8306	5.28681	0.491082	0.621287	17.6601	0.576156	83.951	1.90635
Placebo_V3	MAX	0.471763	55.9293	1.60135	72.709	5.53757	0.40082	22.446	14.6019	27.1516	2.90327	99.855	15.3768	0.0863781	8.1361	18.3939	2.87352	0.734235	6.31388	3.65506	0.19461	0.634735	9.59196	3.21169	2.57117	1.54206	27.7397	2.77911	0	0.575048	13.8151	0.518858	1.71451	1.97446	1.30425	9.74121	82.1714	0.997191
Placebo_V4	MAX	0.310282	45.9108	4.47685	67.4448	10.2483	0.923974	27.76	17.584	35.3875	0.532664	99.9313	14.4799	0.0948275	7.63324	12.8746	3.88639	0.333156	5.76186	12.3319	0.215574	0.732409	10.2934	2.84678	1.77961	1.35838	3.51054	4.75615	0	0.496622	7.18587	1.51081	0.567049	1.30156	2.20938	2.58147	85.2836	0.50962
Placebo_V5	MAX	1.22903	48.8566	6.70639	59.5227	8.19694	2.77735	52.1152	3.94532	40.589	1.11058	99.7182	14.3277	0.977609	7.01371	10.1934	6.46485	0.708622	1.73861	79.3979	0.394233	1.14283	18.055	3.05684	8.71741	5.77839	17.689	5.92899	0.0174459	1.25282	15.0232	1.02546	5.35759	2.77735	12.4884	0.819472	83.1493	0.285708
Verum_V2	MAX	1.81725	46.4196	4.8604	96.3425	6.68318	6.21427	22.5897	3.5243	41.2579	20.6405	99.2185	0	4.50105	5.57057	0	0	8.79641	0.721411	0	18.6386	5.48586	8.45798	23.2779	2.53357	11.7452	21.675	4.29458	10.4926	6.32831	14.3656	0.52586	0.52586	2.53348	3.61618	4.36526	99.6289	0.620644
Verum_V3	MAX	0.603215	69.129	1.38938	93.9288	4.12119	0.514546	25.2172	1.6891	51.2918	0.181053	99.6219	0	11.6451	6.65085	0	0	1.70821	0.654306	0	0.211547	1.2071	5.13136	20.243	25.3343	0.972212	12.8043	4.4032	10.4526	9.92785	10.9265	1.22887	21.6424	1.95474	5.25843	3.78386	99.6545	4.82556
Verum_V4	MAX	0.254877	50.9243	0.610094	97.8909	6.365	1.21537	31.0712	1.73406	26.5972	1.11253	99.6697	0	3.27887	2.40469	0	0	1.30787	0.12724	0	0.98025	0.145913	2.85294	26.5204	5.0521	9.03205	15.5835	2.17389	12.4379	3.33109	10.8037	0.864779	21.4976	0.857267	4.81433	1.32374	99.6758	0.163978
Verum_V5	MAX	3.80755	6.29031	3.36847	87.3977	4.22979	2.02089	35.145	0.896305	35.3885	2.85083	99.7989	0	2.07556	5.45815	0	0	4.99038	0.506014	0	2.4129	0.625613	12.6313	46.9058	15.291	6.11135	5.64835	4.3995	12.8227	4.48776	7.97169	0.310632	33.8923	0.92136	3.96301	8.04943	99.6822	0.705676
